# Supplementary material for: Fluorosolvatochromism of furanyl- and thiophenyl-substituted acetophenones
Source: Royal Society of Chemistry journal article supplement (doi:10.1039/c5nj00256g), 2015-01-01
Supplement: c5nj00256g1.pdf [file c5nj00256g1.pdf]

S1

## Supporting Information for

# Fluorosolvatochromism of furanyl- and thiophenyl-substituted acetophenones

*Nadine Friebe,<sup>a</sup> Katja Schreiter,<sup>a</sup> Joachim Kübel,<sup>b,c</sup> Benjamin Dietzek,<sup>b,c</sup> Norbert Moszner,<sup>d</sup>*

*Peter Burtscher,<sup>d</sup> Alexander Oehlke<sup>a</sup> and Stefan Spange<sup>a\*</sup>*

<sup>a</sup> Department of Polymer Chemistry, Institute of Chemistry, Technische Universität Chemnitz,  
09107 Chemnitz, Germany

<sup>b</sup> Institute of Physical Chemistry and Abbe Center of Photonics, Friedrich-Schiller University  
Jena, Helmholtzweg 4, 07743 Jena, Germany

<sup>c</sup> Leibniz Institute of Photonic Technology (IPHT) Jena e.V., Albert-Einstein-Str. 9,  
07745 Jena, Germany

<sup>d</sup> Ivoclar Vivadent AG, Bendererstrasse 2, 9494 Schaan, Liechtenstein

[stefan.spange@chemie.tu-chemnitz.de](mailto:stefan.spange@chemie.tu-chemnitz.de); Fax: + 49 371 531 21239; Tel: + 49 371 531 21230

### Content.

DFT theoretical calculations

CATALÁN parameter set

UV/Vis absorption and emission maxima of **O1**, **O2**, **O3** and **S1**, both in solution and as solid

Linear solvation energy relationships

**Table S1.** Theoretically calculated HOMO-LUMO energy differences and experimentally measured UV/Vis absorption maxima of acetophenone derivatives.

| R              | HOMO-LUMO gap [eV] <sup>a</sup> | $\tilde{\nu}_{\text{max, exp.}}$ [ $10^3 \text{ cm}^{-1}$ ] <sup>b</sup> |
|----------------|---------------------------------|--------------------------------------------------------------------------|
| H              | 5.212                           | 41.49                                                                    |
| OMe            | 5.007                           | 37.31                                                                    |
| thiophene      | 4.146                           | 31.45                                                                    |
| furan          | 4.045                           | 31.45                                                                    |
| 2-cyanofuran   | 4.010                           | 31.95                                                                    |
| 2-methoxyfuran | 3.737                           | 28.65                                                                    |

<sup>a</sup> Calculated at the B3LYP/def2TZVPP level of theory.  
<sup>b</sup> Measured in dichloromethane.

**Table S2.** CATALÁN parameter set<sup>[S1-S3]</sup>

| solvent                           | SA    | SB    | SP    | SdP   |
|-----------------------------------|-------|-------|-------|-------|
| gas phase                         | 0     | 0     | 0     | 0     |
| <i>n</i> -hexane                  | 0     | 0.056 | 0.616 | 0     |
| diethyl ether                     | 0     | 0.562 | 0.617 | 0.385 |
| tetrachloromethane                | 0     | 0.044 | 0.768 | 0     |
| <i>p</i> -xylene                  | 0     | 0.160 | 0.778 | 0.175 |
| toluene                           | 0     | 0.128 | 0.782 | 0.284 |
| 1,4-dioxane                       | 0     | 0.444 | 0.737 | 0.312 |
| ethyl acetate                     | 0     | 0.542 | 0.656 | 0.603 |
| tetrahydrofuran                   | 0     | 0.591 | 0.714 | 0.634 |
| acetone                           | 0     | 0.475 | 0.651 | 0.907 |
| hexamethylphosphoramide           | 0     | 0.813 | 0.744 | 1.100 |
| <i>N,N</i> -dimethylacetamide     | 0.028 | 0.650 | 0.763 | 0.987 |
| <i>N,N</i> -dimethylformamide     | 0.031 | 0.613 | 0.759 | 0.977 |
| pyridine                          | 0.033 | 0.581 | 0.842 | 0.761 |
| dichloromethane                   | 0.040 | 0.178 | 0.761 | 0.769 |
| acetonitrile                      | 0.044 | 0.286 | 0.645 | 0.974 |
| trichloromethane                  | 0.047 | 0.071 | 0.783 | 0.614 |
| butyrolactone                     | 0.057 | 0.399 | 0.775 | 0.945 |
| dimethyl sulfoxide                | 0.072 | 0.647 | 0.830 | 1.000 |
| anisole                           | 0.084 | 0.299 | 0.820 | 0.543 |
| 1-decanol                         | 0.259 | 0.912 | 0.722 | 0.383 |
| 2-propanol                        | 0.283 | 0.830 | 0.633 | 0.808 |
| 1-butanol                         | 0.341 | 0.809 | 0.674 | 0.655 |
| 1-propanol                        | 0.367 | 0.782 | 0.658 | 0.748 |
| ethanol                           | 0.400 | 0.658 | 0.633 | 0.783 |
| 2,3-butanediol                    | 0.461 | 0.652 | 0.714 | 0.877 |
| 1,2-propanediol                   | 0.475 | 0.598 | 0.731 | 0.888 |
| methanol                          | 0.605 | 0.545 | 0.608 | 0.904 |
| acetic acid                       | 0.689 | 0.390 | 0.651 | 0.676 |
| 1,2-ethanediol                    | 0.717 | 0.534 | 0.777 | 0.910 |
| 2,2,2-trifluoroethanol            | 0.893 | 0.107 | 0.543 | 0.922 |
| 1,1,1,3,3,3-hexafluoro-2-propanol | 1.011 | 0.014 | –     | –     |
| water                             | 1.062 | 0.025 | 0.681 | 0.997 |

**Table S3.** UV/Vis absorption and emission maxima, STOKES shift  $\Delta\tilde{\nu}$  of **O1**, **O2**, **O3** and **S1** measured in 26 solvents of different polarity and hydrogen bond ability.

| solvent               | <b>O1</b>                |                                 |                     | <b>O2</b>                |                                 |                     | <b>O3</b>                |                                 |                     | <b>S1</b>                |                                 |                     |
|-----------------------|--------------------------|---------------------------------|---------------------|--------------------------|---------------------------------|---------------------|--------------------------|---------------------------------|---------------------|--------------------------|---------------------------------|---------------------|
|                       | $\nu_{\max, \text{abs}}$ | $\tilde{\nu}_{\max, \text{em}}$ | $\Delta\tilde{\nu}$ |
| <i>n</i> -hexane      | 32.26                    | –                               | –                   | 29.67                    | 24.63                           | 5.04                | 32.47                    | 22.78                           | 9.69                | 32.26                    | 23.53                           | 8.73                |
| Et <sub>2</sub> O     | 32.15                    | 23.87                           | 8.28                | 29.33                    | 24.04                           | 5.29                | 32.36                    | 22.68                           | 9.68                | 32.15                    | 23.09                           | 9.06                |
| tetra <sup>a</sup>    | 31.75                    | 23.53                           | 8.22                | 28.90                    | 25.13                           | 3.77                | 32.05                    | 23.87                           | 8.18                | 31.75                    | 22.88                           | 8.87                |
| <i>p</i> -xylene      | 31.75                    | 23.31                           | 8.44                | 29.07                    | 23.92                           | 5.15                | 31.95                    | 23.20                           | 8.75                | 31.65                    | 22.57                           | 9.08                |
| toluene               | 31.75                    | 23.98                           | 7.77                | 28.90                    | 24.15                           | 4.75                | 31.85                    | 23.31                           | 8.54                | 31.65                    | 23.04                           | 8.61                |
| dioxane               | 31.95                    | 23.20                           | 8.75                | 29.15                    | 23.75                           | 5.40                | 32.05                    | 23.31                           | 8.74                | 31.85                    | 22.88                           | 8.97                |
| EtOAc                 | 31.95                    | 23.58                           | 8.37                | 29.15                    | 23.31                           | 5.84                | 32.26                    | 23.87                           | 8.39                | 31.95                    | 22.78                           | 9.17                |
| THF <sup>b</sup>      | 31.85                    | 23.64                           | 8.21                | 28.90                    | 23.53                           | 5.37                | 31.85                    | 22.32                           | 9.53                | 31.75                    | 22.62                           | 9.13                |
| acetone               | 30.12                    | 21.97                           | 8.15                | 28.99                    | 22.73                           | 6.26                | 30.30                    | 23.04                           | 7.26                | 30.21                    | 22.27                           | 7.94                |
| HMPA <sup>c</sup>     | 29.15                    | 24.04 <sup>j</sup>              | 5.11                | 28.41                    | 22.62                           | 5.79                | 30.12                    | 23.04                           | 7.08                | 30.96                    | 27.78 <sup>j</sup>              | 3.18                |
| DMAc <sup>d</sup>     | 31.35                    | 22.94                           | 8.41                | 28.74                    | 22.22                           | 6.52                | 31.95                    | 22.83                           | 9.12                | 31.45                    | 21.83                           | 9.62                |
| DMF <sup>e</sup>      | 31.55                    | 21.41                           | 10.14               | 28.65                    | 21.88                           | 6.77                | 31.95                    | 22.78                           | 9.17                | 31.45                    | 21.74                           | 9.71                |
| pyridine              | 31.35                    | –                               | –                   | 28.41                    | 22.68                           | 5.73                | 31.75                    | 22.99                           | 8.76                | 31.06                    | 23.58 <sup>j</sup>              | 7.48                |
| DCM <sup>f</sup>      | 31.45                    | 23.09                           | 8.36                | 28.65                    | 22.94                           | 5.71                | 31.95                    | 23.36                           | 8.59                | 31.45                    | 22.17                           | 9.28                |
| acetonitrile          | 31.85                    | 22.73                           | 9.12                | 29.07                    | 22.27                           | 6.80                | 32.26                    | 22.99                           | 9.27                | 31.85                    | 21.88                           | 9.97                |
| trichloro-<br>methane | 31.25                    | 21.69                           | 9.56                | 28.41                    | 23.09                           | 5.32                | 30.12<br>27.62           | 23.36                           | –                   | 31.35                    | 22.03                           | 9.32                |
| butyrolactone         | 31.45                    | 21.41                           | 10.04               | 28.74                    | 22.17                           | 6.57                | 31.95                    | 22.88                           | 9.07                | 31.65                    | 21.65                           | 10.00               |
| DMSO <sup>g</sup>     | 31.25                    | 22.37                           | 8.88                | 28.57                    | 21.79                           | 6.78                | 31.75                    | 22.37                           | 9.38                | 31.25                    | 21.46                           | 9.79                |
| anisole               | 31.45                    | 22.52                           | 8.93                | 28.65                    | 23.09                           | 5.56                | 31.75                    | 23.20                           | 8.55                | 31.35                    | 22.52                           | 8.83                |
| 2-propanol            | 31.35                    | 24.69                           | 6.66                | 28.41                    | 21.51                           | 6.90                | 32.47                    | 22.27                           | 10.20               | 31.55                    | 24.39                           | 7.16                |
| 1-butanol             | 31.25                    | 24.45                           | 6.80                | 28.33                    | 21.37                           | 6.96                | 32.36                    | 21.98                           | 10.38               | 31.45                    | 24.21                           | 7.24                |
| 1-propanol            | 31.45                    | 24.15                           | 7.30                | 28.33                    | 21.28                           | 7.05                | 32.26                    | 21.88                           | 10.38               | 31.45                    | 23.98                           | 7.47                |
| ethanol               | 31.25                    | 23.87                           | 7.38                | 28.65                    | 21.19                           | 7.46                | 32.36                    | 21.69                           | 10.67               | 31.35                    | 23.92                           | 7.43                |
| methanol              | 31.85                    | 23.47                           | 8.38                | 28.65                    | 20.87                           | 7.78                | 32.36                    | 21.28                           | 11.08               | 31.65                    | 23.75                           | 7.90                |
| TFE <sup>h</sup>      | 31.15                    | 22.99                           | 8.16                | 28.41                    | 21.05                           | 7.36                | 32.15                    | 20.70                           | 11.45               | 31.35                    | 23.36                           | 7.99                |
| water                 | 30.86                    | 22.47                           | 8.39                | 38.17<br>28.65           | 22.42 <sup>j</sup>              | –                   | 34.01                    | 23.75 <sup>j</sup>              | 10.26               | 31.35                    | 22.83                           | 8.52                |
| 1-decanol             | –                        | –                               | –                   | –                        | –                               | –                   | 30.21                    | 22.73                           | 7.48                | –                        | –                               | –                   |
| 1,2-ethane-<br>diol   | –                        | –                               | –                   | –                        | –                               | –                   | 29.76                    | 20.88                           | 8.88                | –                        | –                               | –                   |
| 1,2-propane-<br>diol  | –                        | –                               | –                   | –                        | –                               | –                   | 30.03                    | 21.46                           | 8.57                | –                        | –                               | –                   |
| 2,3-butane-<br>diol   | –                        | –                               | –                   | –                        | –                               | –                   | 30.21                    | 21.93                           | 8.28                | –                        | –                               | –                   |
| acetic acid           | –                        | –                               | –                   | –                        | –                               | –                   | 29.94                    | 21.65                           | 8.29                | –                        | –                               | –                   |
| HFIP <sup>i</sup>     | –                        | –                               | –                   | –                        | –                               | –                   | 29.76                    | 20.33                           | 9.43                | –                        | –                               | –                   |

<sup>a</sup> tetrachloromethane, <sup>b</sup> tetrahydrofuran, <sup>c</sup> hexamethylphosphoramide, <sup>d</sup> *N,N*-dimethylacetamide, <sup>e</sup> *N,N*-dimethylformamide, <sup>f</sup> dichloromethane, <sup>g</sup> dimethyl sulfoxide, <sup>h</sup> 2,2,2-trifluoroethanol, <sup>i</sup> 1,1,1,3,3,3-hexafluoro-2-propanol, <sup>j</sup> was not included in LSER by CATALÁN. The last-mentioned solvents were only used for the LSER calculation of the compound **O3**.

**Table S4.** UV/Vis absorption and emission maxima, STOKES shift  $\Delta\tilde{\nu}$  of **O1**, **O2**, **O3** and **S1** measured as powder.

| compound  | $\tilde{\nu}_{\max, \text{abs}}$<br>(10 <sup>3</sup> cm <sup>-1</sup> ) | $\tilde{\nu}_{\max, \text{em}}$<br>(10 <sup>3</sup> cm <sup>-1</sup> ) | $\Delta\tilde{\nu}$ (10 <sup>3</sup><br>cm <sup>-1</sup> ) |
|-----------|-------------------------------------------------------------------------|------------------------------------------------------------------------|------------------------------------------------------------|
| <b>O1</b> | 28.90                                                                   | – <sup>a</sup>                                                         | –                                                          |
| <b>O2</b> | 28.41                                                                   | 19.08                                                                  | 9.33                                                       |
| <b>O3</b> | 29.33<br>(25.25) <sup>b</sup>                                           | 20.58                                                                  | 8.75<br>(4.67) <sup>b</sup>                                |
| <b>S1</b> | 28.82                                                                   | 21.50                                                                  | 7.32                                                       |

<sup>a</sup> solid-state fluorescence was not observed.

<sup>b</sup> double band

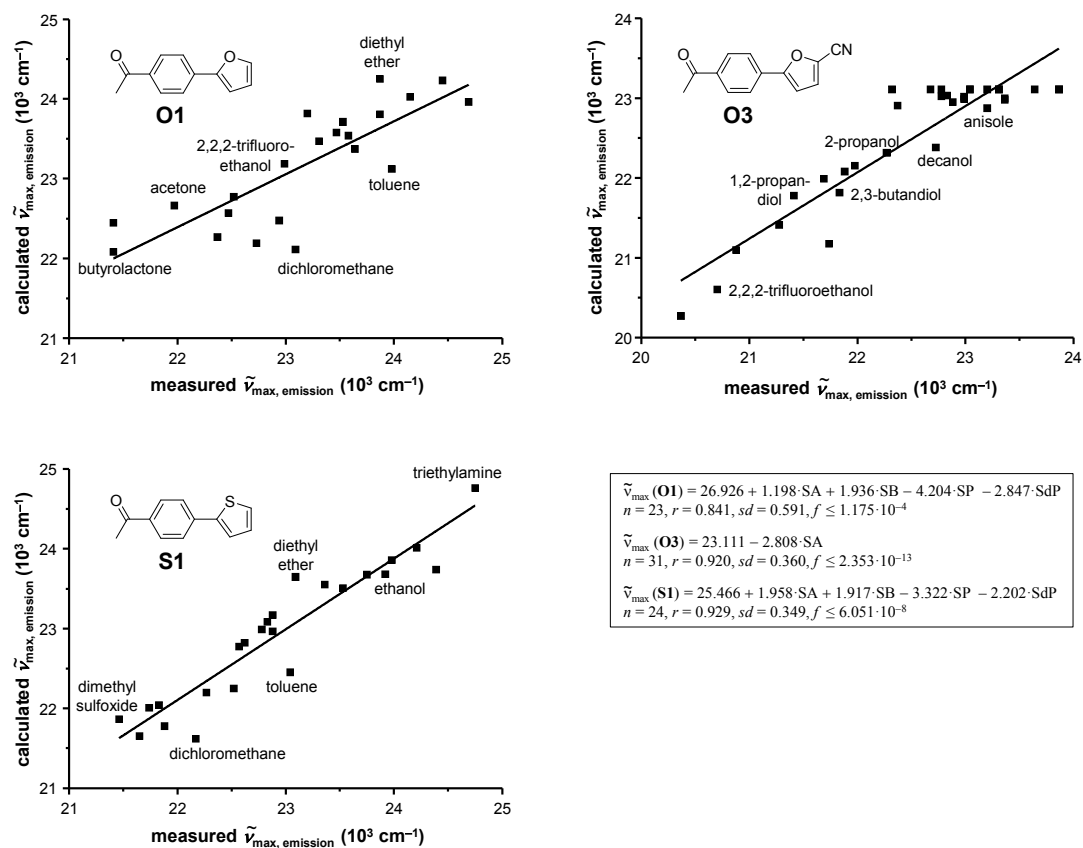

**Figure S1.** Linear solvation energy relationships for the emission of **O1**, **O3** and **S1** in various solvents. Plots of measured vs. calculated emission maxima, according to the CATALÁN equation, are shown.

## References

- [S1] J. Catalán, *J. Phys. Chem. B* **2009**, *113*, 5951–5960.
- [S2] J. Catalán, C. Díaz, *Eur. J. Org. Chem.* **1999**, 885–891.
- [S3] J. Catalán, C. Díaz, V. López, P. Pérez, J.-L. G. de Paz, J. G. Rodríguez, *Liebigs Ann.* **1996**, 1785–1794.
